# Supplementary material for: Sono-Enzymatically Embedded Antibacterial Silver-Lignin Nanoparticles on Cork Filter Material for Water Disinfection
Source: MDPI journal article supplement (doi:10.3390/ijms231911679), 2022-10-02
Supplement: s1 [file s1]

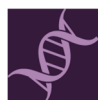

Supplementary Materials

# Sono-Enzymatically Embedded Antibacterial Silver-Lignin Nanoparticles on Cork Filter Material for Water Disinfection

Lizeth Bermeo <sup>1,2</sup>, Kristina Ivanova <sup>3</sup>, Leonardo Martín Pérez <sup>1,4,5</sup>, Eva Forés <sup>1</sup>, Sílvia Pérez-Rafael <sup>3</sup>, Juan C. Casas-Zapata <sup>2</sup>, Jordi Morató <sup>1</sup> and Tzanko Tzanov <sup>3,\*</sup>

<sup>1</sup> UNESCO Chair on Sustainability, ESEIAAT, Universitat Politècnica de Catalonian, 08222 Terrassa, Spain

<sup>2</sup> Grupo de Investigación Ciencia e Ingeniería en Sistemas Ambientales (GCISA), Facultad de Ingeniería Civil, Departamento de Ing. Ambiental, Universidad Del Cauca, Calle 5 No. 4-70, Popayán 190002, Colombia

<sup>3</sup> Grup de Biotecnologia Molecular i Industrial, Departament d'Enginyeria Química, Universitat Politècnica de Catalunya, 08222 Terrassa, Spain

<sup>4</sup> Instituto de Investigaciones en Ingeniería Ambiental, Química y Biotecnología Aplicada (INGEBIO), Facultad de Química e Ingeniería del Rosario, Pontificia Universidad Católica Argentina (UCA), Av. Pellegrini 3314, S2002QEO Rosario, Santa Fe S2002lrk, Argentina

<sup>5</sup> Consejo Nacional de Investigaciones Científicas y Técnicas (CONICET) and Facultad de Ciencias Bioquímicas y Farmacéuticas, Universidad Nacional de Rosario (UNR), Suipacha 531, S2002LRK Rosario, Santa Fe S2002lrk, Argentina

\* Correspondence: tzanko.tzanov@upc.edu

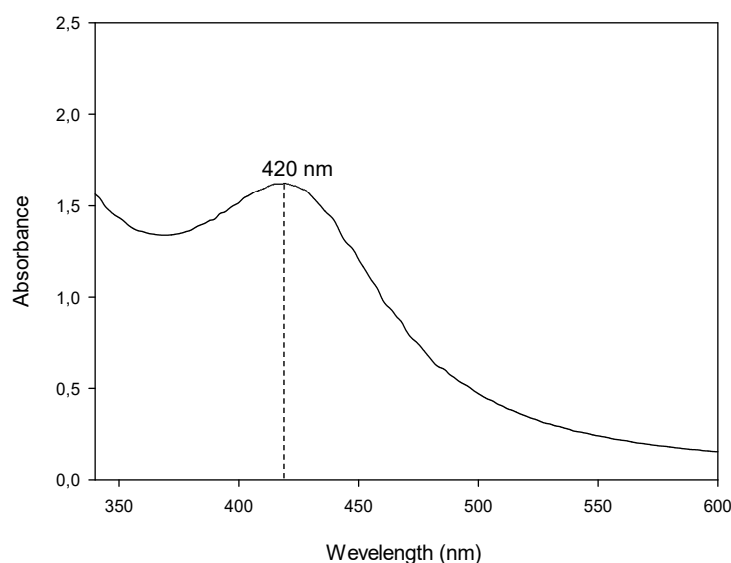

**Figure S1.** UV-vis spectrum absorption spectrum of the hybrid Ag-lignin nanoparticles (AgLNP) synthesized at the present study.

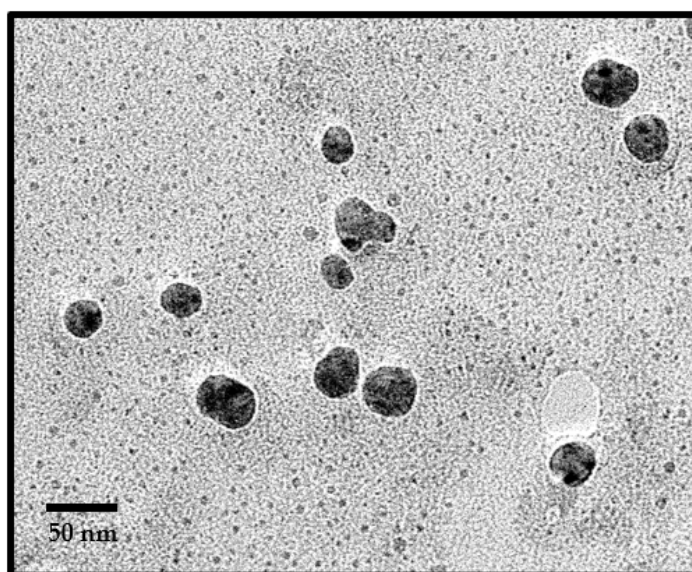

**Figure S2.** Representative TEM images showing the size and morphology of the AgLNP. Note the regular spherical shape of the nanoparticles with rather similar diameters of the AgLNP.
